# Supplementary material
Source: publisher site journal article supplement (https://www.dovepress.com/article/478604)
Supplement: Supplementary file 1 [file get_supplementary_file.php]

**Supplementary files**

**
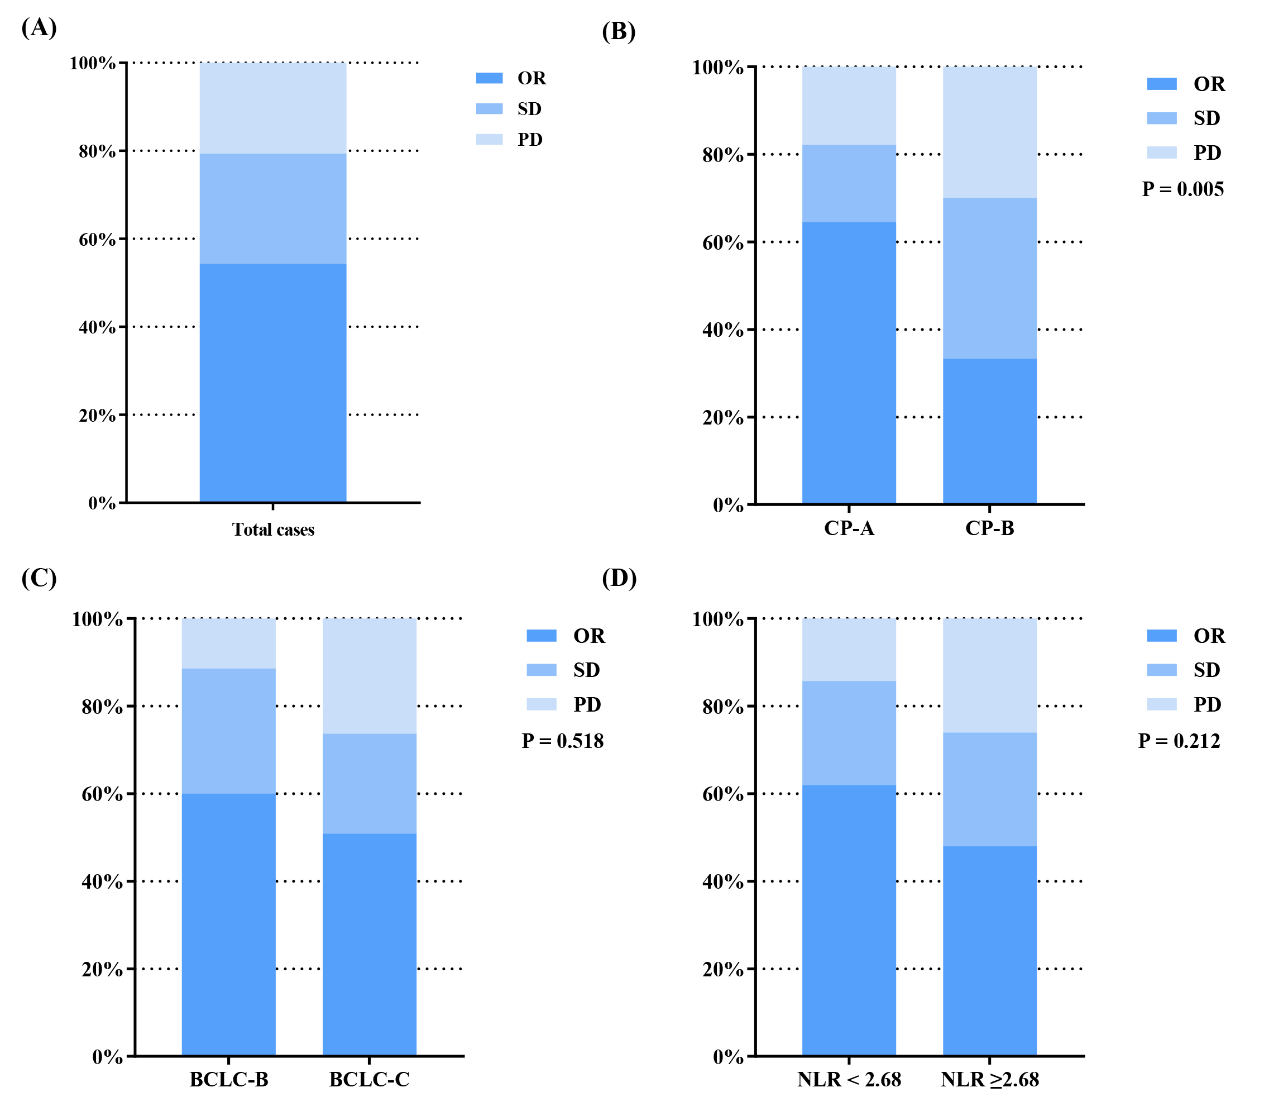
Supplementary Figure 1:** Radiological response, as assessed by modified Response Evaluation Criteria in Solid Tumors (mRECIST) in the total cohort (A), and according to Child-Pugh (CP) grade (B), Barcelona Clinic Liver Cancer (BCLC) stage (C), and neutrophil-to-lymphocyte ratio (NLR) levels (D).

**
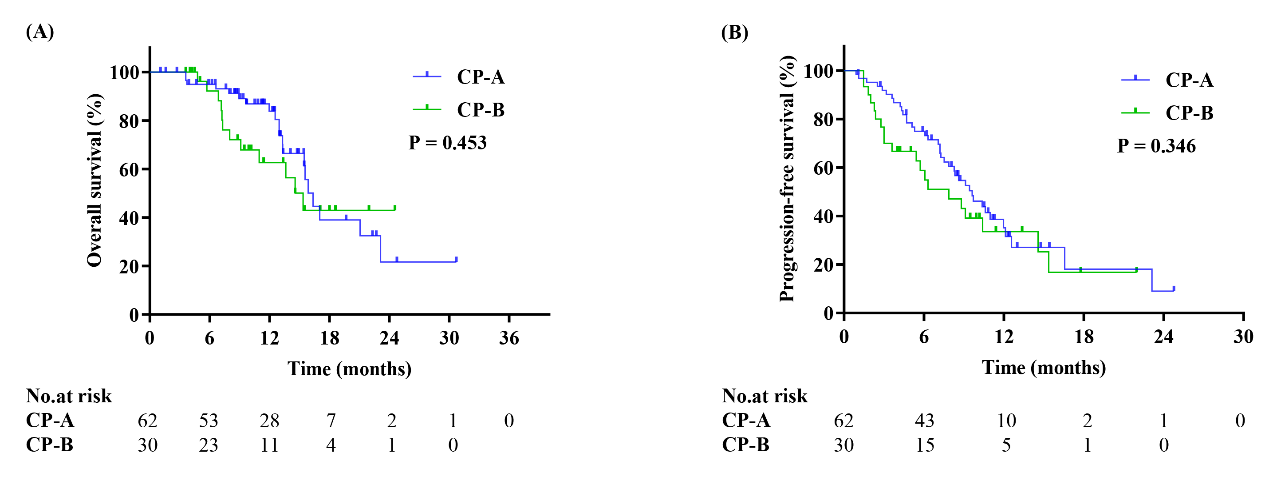
**

**Supplementary Figure 2:** Kaplan-Meier curves describing the overall survival (OS) (A) and the progression-free survival (PFS) (B) of the efficacy of patients stratified by Child-Pugh (CP) grade.

**Supplementary Table 1. Comparison of the present study with our latest published study by Zhang et al.**

| Characteristics | The present study | The study conducted by Zhang et al. |
| --- | --- | --- |
| Study design | Retrospective, multi-centers (1. The First Affiliated Hospital With Nanjing Medical University; 2. Jinling Hospital, Affiliated Hospital of Medical School, Nanjing University; 3. The Affiliated Hospital of Xuzhou Medical University; 4 The Affiliated Cancer Hospital of Nanjing Medical University) | Retrospective, multi-centers (1. The First Affiliated Hospital With Nanjing Medical University; 2. Jinling Hospital, Affiliated  Hospital of Medical School, Nanjing University;3. The Second Hospital of Nanjing, Nanjing University of Chinese Medicine; 4. School of Medicine, Sir Run Run Shaw Hospital, Zhejiang University) |
| Population | BCLC B and C stages [35 BCLC B stage, 57 BCLC C stage] | BCLC C stage (all patients with PVTT) |
| Number of cases | 92 | 184 |
| Enrolled range | August 2021 and September 2023 | January 2019 and January 2022 |
| Intervention | TACE + atezolizumab + Bevacizumab | TACE + ICIs (camrelizumab or sintilimab or atezolizumab) + TKIs ((lenvatinib or sorafenib) |
| Comparison | Single arm | TACE-ICI-TKIs vs. ICI-TKIs |
| Outcomes | Tumor response, Time to response, Progression-free survival, Overall survival, and Adverse events | Tumor response, Progression-free survival, Overall survival, and Adverse events |
| Follow up times | 14.1 months | 19.0 months |

Note: Data from Zhang JX, Cheng Y, Wei J, et al. Transarterial Chemoembolization Combined with Tyrosine Kinase Inhibitors Plus Immune Checkpoint Inhibitors Versus Tyrosine Kinase Inhibitors Plus Immune Checkpoint Inhibitors in Unresectable Hepatocellular Carcinoma with First- or Lower-Order Portal Vein Tumor Thrombosis. *Cardiovasc Intervent Radiol*. 2024;47(6):751-761. doi: 10.1007/s00270-024-03724-x.
